# Supplementary material
Source: PubMed Central journal article supplement (PMC7139275)
Supplement: jama-323-1266-s002.pdf [file jama-323-1266-s002.pdf]

## Supplementary Online Content

Tap WD, Wagner AJ, Schöffski P, et al; ANNOUNCE investigators. Effect of doxorubicin plus olaratumab vs doxorubicin plus placebo on survival in patients with advanced soft tissue sarcomas: the ANNOUNCE randomized clinical trial. *JAMA*. doi:10.1001/jama.2020.1707

**eTable 1.** List of Prespecified Secondary Endpoints

**eTable 2.** List of Prespecified Subgroups for Overall Survival Analysis

**eTable 3.** Baseline Pathological Diagnosis and Histopathological Grade

**eTable 4.** Best Overall Response in the Total Soft Tissue Sarcoma Population

**eTable 5.** Best Overall Response in the Leiomyosarcoma Population

**eTable 6.** Post-discontinuation Therapy in the Total Soft Tissue Sarcoma Population

**eTable 7.** Overall Survival by Treatment and PDGFR Status (Positive/Negative) in the Total Soft Tissue Sarcoma Population

**eTable 8.** Summary of Abnormal Left Ventricular Ejection Fraction Results Over Time

**eFigure 1.** Flow of Patient Disposition in the Leiomyosarcoma Population

**eFigure 2.** Overall Survival by PDGFR $\alpha$  IHC Status (Positive or Negative) in the Total Soft Tissue Sarcoma Population

This supplementary material has been provided by the authors to give readers additional information about their work.

**eTable 1. List of Prespecified Secondary Endpoints**

| <b>Secondary Endpoint</b>                                                                                                                                                                                                                        |
|--------------------------------------------------------------------------------------------------------------------------------------------------------------------------------------------------------------------------------------------------|
| Progression-free survival                                                                                                                                                                                                                        |
| Objective response rate (complete response + partial response)                                                                                                                                                                                   |
| Disease control rate (complete response + partial response + stable disease)                                                                                                                                                                     |
| Patient-reported outcomes assessed by 3 scales<br>European Organization for Research and Treatment of Cancer Quality of Life Questionnaire Core 30 version 3.0 (EORTC-QLQ-C30)<br>Brief Pain Inventory Short Form Modified (mBPI-sf)<br>EQ-5D-5L |
| Duration of disease control                                                                                                                                                                                                                      |
| Safety and tolerability                                                                                                                                                                                                                          |
| Pharmacokinetics                                                                                                                                                                                                                                 |
| Immunogenicity                                                                                                                                                                                                                                   |

## eTable 2. List of Prespecified Subgroups for Overall Survival Analysis

OS and PFS HR for treatment effect (with 95% CI) will be estimated using an unstratified Cox PH model for each of the following subgroups (defined based on eCRF data):

- number of prior systemic therapies for advanced/metastatic disease (0 vs  $\geq 1$ )
- prior systemic treatment in the neo-adjuvant or adjuvant setting (yes vs no)
- Histology (LMS vs LPS vs undifferentiated pleomorphic sarcoma vs other STS subtypes)
- LMS primary site (uterine vs non-uterine)
- ECOG performance status (0 vs 1)
- region (North America vs Europe vs ROW)
- disease stage at randomization (metastatic disease vs only locally advanced disease)
- liver lesions (presence at baseline vs absence at baseline)
- lung lesions (presence at baseline vs absence at baseline)
- sex (females vs males)
- age (<65 years vs  $\geq 65$  years)
- weight (above and below median)
- duration of disease since diagnosis (above and below median)
- grade of STS at diagnosis (1/low vs 2/intermediate vs 3/high)
- albumin level (above and below 35 g/dL)
- ALT (above and below median)
- bone lesions (presence at baseline vs absence at baseline)
- prior radiation therapy (none vs any)
- duration of most recent prior systemic therapy (above and below median)
- hemoglobin (above and below median)
- platelets (above and below 350  $\mu$ liters)
- leukocytes (above and below 10,000  $\mu$ liters)
- PDGFR $\alpha$  status (positive and negative)

Abbreviations: ALT, alanine aminotransferase; CI, confidence interval; ECOG, Eastern Cooperative Oncology Group; eCRF, electronic case report form; HR, hazard ratio; LMS, leiomyosarcoma; LPS, liposarcoma; OS, overall survival; PFS, progression-free survival; PDGFR, platelet-derived growth factor; PH, proportional hazards; ROW, rest of world; STS, soft tissue sarcoma.

**eTable 3. Baseline Pathological Diagnosis and Histopathological Grade**

| <b>Initial Pathological Diagnosis, n (%)</b>                            | <b>Doxorubicin +<br/>Olaratumab<br/>(N = 258)</b> | <b>Doxorubicin +<br/>Placebo<br/>(N = 251)</b> |
|-------------------------------------------------------------------------|---------------------------------------------------|------------------------------------------------|
| <b>Adipocytic tumors</b>                                                | 48 (18.6)                                         | 43 (17.1)                                      |
| Dedifferentiated liposarcoma                                            | 24 (9.3)                                          | 17 (6.8)                                       |
| Liposarcoma NOS                                                         | 4 (1.6)                                           | 1 (0.4)                                        |
| Myxoid liposarcoma                                                      | 10 (3.9)                                          | 11 (4.4)                                       |
| Pleomorphic liposarcoma                                                 | 3 (1.2)                                           | 3 (1.2)                                        |
| Well differentiated liposarcoma                                         | 7 (2.7)                                           | 11 (4.4)                                       |
| <b>Fibroblastic/myofibroblastic tumors</b>                              | 14 (5.4)                                          | 18 (7.2)                                       |
| Fibrosarcoma                                                            | 4 (1.6)                                           | 6 (2.4)                                        |
| Low-grade fibromyxoid sarcoma                                           | 1 (0.4)                                           | 0 (0.0)                                        |
| Malignant solitary fibrous tumor                                        | 5 (1.9)                                           | 4 (1.6)                                        |
| Myxofibrosarcoma                                                        | 4 (1.6)                                           | 8 (3.2)                                        |
| <b>Fibrohistiocytic tumor and undifferentiated/unclassified sarcoma</b> | 34 (13.2)                                         | 30 (12.0)                                      |
| Undifferentiated epithelioid sarcoma                                    | 2 (0.8)                                           | 1 (0.4)                                        |
| Undifferentiated pleomorphic sarcoma                                    | 21 (8.1)                                          | 19 (7.6)                                       |
| Undifferentiated sarcoma NOS                                            | 4 (1.6)                                           | 3 (1.2)                                        |
| Undifferentiated spindle cell sarcoma                                   | 7 (2.7)                                           | 7 (2.8)                                        |
| <b>Nerve sheath tumors and tumors of uncertain differentiation</b>      | 20 (7.8)                                          | 21 (8.4)                                       |
| Alveolar soft-part sarcoma                                              | 1 (0.4)                                           | 0 (0.0)                                        |
| Clear cell sarcoma of soft tissue                                       | 3 (1.2)                                           | 2 (0.8)                                        |
| Epithelioid malignant nerve sheath tumor                                | 1 (0.4)                                           | 0 (0.0)                                        |
| Epithelioid sarcoma                                                     | 2 (0.8)                                           | 1 (0.4)                                        |
| Extraskeletal myxoid chondrosarcoma                                     | 2 (0.8)                                           | 0 (0.0)                                        |
| Malignant peripheral nerve sheath tumor                                 | 6 (2.3)                                           | 9 (3.6)                                        |
| Pecoma NOS, malignant                                                   | 0 (0.0)                                           | 1 (0.4)                                        |
| Synovial cell sarcoma                                                   | 5 (1.9)                                           | 8 (3.2)                                        |
| <b>Skeletal-muscle tumors</b>                                           | 4 (1.6)                                           | 5 (2.0)                                        |
| Pleomorphic rhabdomyosarcoma                                            | 3 (1.2)                                           | 1 (0.4)                                        |
| Spindle cell/sclerosing rhabdomyosarcoma                                | 1 (0.4)                                           | 4 (1.6)                                        |
| <b>Smooth-muscle tumors</b>                                             | 119 (46.1)                                        | 115 (45.8)                                     |
| Leiomyosarcoma                                                          | 119 (46.1)                                        | 115 (45.8)                                     |
| Uterine                                                                 | 46 (38.7)                                         | 48 (41.7)                                      |
| Non-uterine                                                             | 73 (61.3)                                         | 67 (58.3)                                      |
| <b>Vascular and pericytic (perivascular) tumors</b>                     | 10 (3.9)                                          | 12 (4.8)                                       |
| Angiosarcoma of soft tissue                                             | 10 (3.9)                                          | 9 (3.6)                                        |
| Epithelioid hemangioendothelioma                                        | 0 (0.0)                                           | 3 (1.2)                                        |
| <b>Lymphoma<sup>a</sup></b>                                             | 1 (0.4)                                           | 0 (0.0)                                        |

**eTable 3. Baseline Pathological Diagnosis and Histopathological Grade (continued)**

| Initial Pathological Diagnosis, n (%)           | Doxorubicin + Olaratumab (N = 258) | Doxorubicin + Placebo (N = 251) |
|-------------------------------------------------|------------------------------------|---------------------------------|
| <b>Other</b>                                    | 9 (3.5)                            | 7 (2.8)                         |
| Clear cell sarcoma of soft tissue               | 1 (0.4)                            | 0 (0.0)                         |
| Endometrial stromal sarcoma                     | 4 (1.6)                            | 1 (0.4)                         |
| Giant cell tumor of tendon sheath               | 0 (0.0)                            | 1 (0.4)                         |
| Hemangiopericytoma                              | 0 (0.0)                            | 1 (0.4)                         |
| Neurofibrosarcoma                               | 0 (0.0)                            | 1 (0.4)                         |
| Phyllodes tumor                                 | 1 (0.4)                            | 0 (0.0)                         |
| Soft tissue sarcoma                             | 2 (0.8)                            | 2 (0.8)                         |
| Undifferentiated sarcoma                        | 0 (0.0)                            | 1 (0.4)                         |
| <b>Histopathological Diagnosis Grade, n (%)</b> |                                    |                                 |
| Low grade                                       | 16 (6.2)                           | 28 (11.2)                       |
| Intermediated grade                             | 60 (23.3)                          | 47 (18.7)                       |
| High grade                                      | 130 (50.4)                         | 128 (51.0)                      |
| Uninterpretable                                 | 48 (18.6)                          | 45 (17.9)                       |
| Not done                                        | 4 (1.6)                            | 3 (1.2)                         |

<sup>a</sup>Lymphoma is not a subtype of soft tissue sarcoma. Enrollment of this patient was a protocol violation. Abbreviation: NOS, not otherwise specified.

**eTable 4. Best Overall Response in the Total Soft Tissue Sarcoma Population**

|                                        | Doxorubicin + Olaratumab |           | Doxorubicin + Placebo |           | OR (95% CI)   | p-value |
|----------------------------------------|--------------------------|-----------|-----------------------|-----------|---------------|---------|
|                                        | n (%)                    | 95% CI    | n (%)                 | 95% CI    |               |         |
| <b>Best overall response</b>           |                          |           |                       |           |               |         |
| Complete response (CR)                 | 2 (0.8)                  | 0.0–1.8   | 1 (0.4)               | 0.0–1.2   | —             | —       |
| Partial response (PR)                  | 34 (13.2)                | 9.1–17.3  | 45 (17.9)             | 13.2–22.7 | —             | —       |
| Stable disease (SD)                    | 138 (53.5)               | 47.4–59.6 | 144 (57.4)            | 51.3–63.5 | —             | —       |
| Progressive disease (PD)               | 70 (27.1)                | 21.7–32.6 | 52 (20.7)             | 15.7–25.7 | —             | —       |
| Non-evaluable                          | 14 (5.4)                 | 2.7–8.2   | 9 (3.6)               | 1.3–5.9   | —             | —       |
| <b>Overall response rate (CR/PR)</b>   | 36 (14.0)                | 9.7–18.2  | 46 (18.3)             | 13.5–23.1 | 0.7 (0.4–1.2) | 0.1837  |
| <b>Disease control rate (CR/PR/SD)</b> | 174 (67.4)               | 61.7–73.2 | 190 (75.7)            | 70.4–81.0 | 0.7 (0.5–1.0) | 0.0595  |

Abbreviation: OR, odds ratio.

**eTable 5. Best Overall Response in the Leiomyosarcoma Population**

|                                        | Doxorubicin + Olaratumab |             | Doxorubicin + Placebo |             |               |         |
|----------------------------------------|--------------------------|-------------|-----------------------|-------------|---------------|---------|
|                                        | n (%)                    | 95% CI      | n (%)                 | 95% CI      | OR (95% CI)   | p-value |
| <b>Best overall response</b>           |                          |             |                       |             |               |         |
| Complete response (CR)                 | 1 (0.8)                  | (0.0–2.5)   | 0 (0)                 | (N/A)       | —             | —       |
| Partial response (PR)                  | 15 (12.6)                | (6.6–18.6)  | 26 (22.6)             | (15.0–30.3) | —             | —       |
| Stable disease (SD)                    | 59 (49.6)                | (40.6–58.6) | 69 (60.0)             | (51.0–69.0) | —             | —       |
| Progressive disease (PD)               | 40 (33.6)                | (25.1–42.1) | 17 (14.8)             | (8.3–21.3)  | —             | —       |
| Non-evaluable                          | 4 (3.4)                  | (0.1–6.6)   | 3 (2.6)               | (0.0–5.5)   | —             | —       |
| <b>Overall response rate (CR/PR)</b>   | 16 (13.4)                | (7.3–19.6)  | 26 (22.6)             | (15.0–30.3) | 0.5 (0.3–1.1) | 0.0890  |
| <b>Disease control rate (CR/PR/SD)</b> | 75 (63.0)                | (54.4–71.7) | 95 (82.6)             | (75.7–89.5) | 0.4 (0.2–0.7) | 0.0011  |

Abbreviation: OR, odds ratio.

**eTable 6. Post-discontinuation Therapy in the Total Soft Tissue Sarcoma Population**

| Post-discontinuation therapy, n (%) | Doxorubicin + Olaratumab (N = 258) | Doxorubicin + Placebo (N = 251) |
|-------------------------------------|------------------------------------|---------------------------------|
| <b>Surgical procedure</b>           | 32 (12.4)                          | 28 (11.2)                       |
| <b>Radiotherapy</b>                 | 39 (15.1)                          | 70 (27.9)                       |
| <b>Systemic therapy</b>             |                                    |                                 |
| Overall                             | 178 (69.0)                         | 169 (67.3)                      |
| Anastrozole                         | 0 (0.0)                            | 1 (0.4)                         |
| Anlotinib                           | 1 (0.4)                            | 0 (0.0)                         |
| Bevacizumab                         | 0 (0.0)                            | 1 (0.4)                         |
| Brentuximab Vedotin                 | 1 (0.4)                            | 0 (0.0)                         |
| Cabozantinib                        | 1 (0.4)                            | 0 (0.0)                         |
| Carboplatin                         | 2 (0.8)                            | 1 (0.4)                         |
| Chemotherapeutics                   | 1 (0.4)                            | 0 (0.0)                         |
| Cisplatin                           | 6 (2.3)                            | 4 (1.6)                         |
| Cyclophosphamide                    | 10 (3.9)                           | 8 (3.2)                         |
| Dacarbazine                         | 31 (12.0)                          | 35 (13.9)                       |
| Denosumab                           | 2 (0.8)                            | 2 (0.8)                         |
| Dexamethasone                       | 0 (0.0)                            | 2 (0.8)                         |
| Dexrazoxane                         | 1 (0.4)                            | 0 (0.0)                         |
| Docetaxel                           | 40 (15.5)                          | 48 (19.1)                       |
| Docetaxel plus gemcitabine          | 0 (0.0)                            | 1 (0.4)                         |
| Doxorubicin                         | 10 (3.9)                           | 17 (6.8)                        |
| Durvalumab                          | 1 (0.4)                            | 1 (0.4)                         |
| Efatutazone                         | 0 (0.0)                            | 1 (0.4)                         |
| Epirubicin                          | 0 (0.0)                            | 1 (0.4)                         |
| Eribulin                            | 18 (7.0)                           | 24 (9.6)                        |
| Etoposide                           | 7 (2.7)                            | 10 (4.0)                        |
| Everolimus                          | 2 (0.8)                            | 1 (0.4)                         |
| Faz 053                             | 1 (0.4)                            | 0 (0.0)                         |
| Gemcitabine                         | 72 (27.9)                          | 82 (32.7)                       |
| Ifosfamide                          | 25 (9.7)                           | 26 (10.4)                       |
| Investigational Drug                | 8 (3.1)                            | 6 (2.4)                         |
| Ipilimumab                          | 3 (1.2)                            | 2 (0.8)                         |



**eTable 6. Post-discontinuation Therapy in the Total Soft Tissue Sarcoma Population (continued)**

| <b>Post-discontinuation therapy, n (%)</b> | <b>Doxorubicin +<br/>Olaratumab<br/>(N = 258)</b> | <b>Doxorubicin +<br/>Placebo<br/>(N = 251)</b> |
|--------------------------------------------|---------------------------------------------------|------------------------------------------------|
| Irinotecan                                 | 2 (0.8)                                           | 0 (0.0)                                        |
| Liposomal Doxorubicin                      | 1 (0.4)                                           | 0 (0.0)                                        |
| Lurbinectedin                              | 2 (0.8)                                           | 0 (0.0)                                        |
| Megestrol                                  | 0 (0.0)                                           | 1 (0.4)                                        |
| Mesna                                      | 4 (1.6)                                           | 4 (1.6)                                        |
| Mitomycin                                  | 1 (0.4)                                           | 0 (0.0)                                        |
| Naloxegol                                  | 0 (0.0)                                           | 1 (0.4)                                        |
| Nintedanib                                 | 1 (0.4)                                           | 1 (0.4)                                        |
| Nivolumab                                  | 8 (3.1)                                           | 4 (1.6)                                        |
| Olaparib                                   | 1 (0.4)                                           | 0 (0.0)                                        |
| Olaratumab                                 | 1 (0.4)                                           | 1 (0.4)                                        |
| Paclitaxel                                 | 8 (3.1)                                           | 5 (2.0)                                        |
| Palbociclib                                | 1 (0.4)                                           | 1 (0.4)                                        |
| Pazopanib                                  | 55 (21.3)                                         | 57 (22.7)                                      |
| Pembrolizumab                              | 4 (1.6)                                           | 4 (1.6)                                        |
| Placebo                                    | 0 (0.0)                                           | 1 (0.4)                                        |
| Prasterone                                 | 0 (0.0)                                           | 1 (0.4)                                        |
| Prednisolone                               | 1 (0.4)                                           | 0 (0.0)                                        |
| Ribociclib                                 | 1 (0.4)                                           | 0 (0.0)                                        |
| Selinexor                                  | 0 (0.0)                                           | 2 (0.8)                                        |
| Sirolimus                                  | 0 (0.0)                                           | 1 (0.4)                                        |
| Sunitinib                                  | 4 (1.6)                                           | 1 (0.4)                                        |
| Temozolomide                               | 2 (0.8)                                           | 0 (0.0)                                        |
| Topotecan                                  | 1 (0.4)                                           | 2 (0.8)                                        |
| Trabectedin                                | 65 (25.2)                                         | 67 (26.7)                                      |
| Trofosfamide                               | 0 (0.0)                                           | 1 (0.4)                                        |
| Vincristine                                | 1 (0.4)                                           | 2 (0.8)                                        |
| Vinorelbine                                | 0 (0.0)                                           | 1 (0.4)                                        |
| Vorinostat                                 | 0 (0.0)                                           | 2 (0.8)                                        |
| Zoledronic Acid                            | 2 (0.8)                                           | 1 (0.4)                                        |

**eTable 7. Overall Survival by Treatment and PDGFR Status (Positive/Negative) in the Total Soft Tissue Sarcoma Population**

| PDGFR IHC Status <sup>b</sup><br>(+ or -)     | Doxorubicin +<br>Olaratumab <sup>a</sup> |             | Doxorubicin +<br>Placebo <sup>a</sup> |             | Stratified HR<br>(95% CI) |
|-----------------------------------------------|------------------------------------------|-------------|---------------------------------------|-------------|---------------------------|
|                                               | N                                        | mOS, months | n                                     | mOS, months |                           |
| PDGFR- $\alpha$ (+)                           | 267                                      | 17.2        | 133                                   | 19.1        | 1.09 (0.81–1.47)          |
| PDGFR- $\alpha$ (-)                           | 195                                      | 23.6        | 95                                    | 21.9        | 0.93 (0.65–1.34)          |
| PDGFR- $\beta$ (+)                            | 323                                      | 18.8        | 163                                   | 19.9        | 1.10 (0.84–1.44)          |
| PDGFR- $\beta$ (-)                            | 141                                      | 28.3        | 66                                    | 20.6        | 0.85 (0.54–1.33)          |
| PDGFR- $\alpha$ (-) and<br>PDGFR- $\beta$ (-) | 97                                       | 28.5        | 43                                    | 20.6        | 0.79 (0.46–1.37)          |
| PDGFR- $\alpha$ (-) and<br>PDGFR- $\beta$ (+) | 97                                       | 20.8        | 51                                    | 22.9        | 1.07 (0.65–1.75)          |
| PDGFR- $\alpha$ (+) and<br>PDGFR- $\beta$ (-) | 42                                       | 14.4        | 22                                    | 19.5        | 1.03 (0.45–2.36)          |
| PDGFR- $\alpha$ (+) and<br>PDGFR- $\beta$ (+) | 222                                      | 17.2        | 110                                   | 19.1        | 1.11 (0.81–1.54)          |

Abbreviations: +, positive; -, negative; HR, hazard ratio; IHC, immunohistochemistry; mOS, median overall survival; N, total number of patients from both treatment groups; n, number of patients within treatment group; PDGFR, platelet-derived growth factor receptor. <sup>a</sup>The number of patients included in the prespecified PDGFR- $\alpha$  analysis were 228 (olaratumab) and 234 (placebo). The number of patients included in the post hoc PDGFR- $\beta$  analysis were 229 (olaratumab) and 235 (placebo). <sup>b</sup>PDGFR- $\alpha$  tumor status was determined with a rabbit monoclonal antibody (Cell Signaling Technology clone D13C6) specific for PDGFR- $\alpha$  without cross-reactivity to PDGFR- $\beta$ . PDGFR- $\beta$  tumor status was determined with a mouse monoclonal antibody (Cell Signaling Technology clone 2B3) proven to be specific for PDGFR- $\beta$  with no cross-reactivity for PDGFR- $\alpha$ . The status for PDGFR- $\alpha$  and PDGFR- $\beta$  was provided as a dichotomous variable with “positive” and “negative” expression, where a “positive” result showed  $\geq 10\%$  of the tumor as demonstrating at least weak but specific membranous expression (1+ on a 0, 1+, 2+, 3+ scale of staining intensity). “Negative” corresponded to expression that did not meet these criteria.

**eTable 8. Summary of Abnormal Left Ventricular Ejection Fraction Results Over Time**

|                                                                       | <b>Doxorubicin +<br/>Olaratumab<br/>(N = 257)</b> | <b>Doxorubicin +<br/>Placebo<br/>(N = 249)</b> |
|-----------------------------------------------------------------------|---------------------------------------------------|------------------------------------------------|
| <b>Baseline, n</b>                                                    | 254                                               | 244                                            |
| <50%, n (%)                                                           | 0 (0.0)                                           | 0 (0.0)                                        |
| <b>Prior to Cycle 5, n</b>                                            | 105                                               | 96                                             |
| <50%, n (%)                                                           | 0 (0.0)                                           | 3 (3.1)                                        |
| >10% decrease in LVEF over baseline, n (%)                            | 22 (21.0)                                         | 22 (22.9)                                      |
| <50% absolute value and/or >10% decrease in LVEF over baseline, n (%) | 22 (21.0)                                         | 22 (22.9)                                      |
| <b>Prior to Cycle 7, n</b>                                            | 78                                                | 75                                             |
| <50%, n (%)                                                           | 3 (3.8)                                           | 3 (4.0)                                        |
| >10% decrease in LVEF over baseline, n (%)                            | 21 (26.9)                                         | 15 (20.0)                                      |
| <50% absolute value and/or >10% decrease in LVEF over baseline, n (%) | 21 (26.9)                                         | 15 (20.0)                                      |
| <b>Prior to Cycle 9, n</b>                                            | 71                                                | 87                                             |
| <50%, n (%)                                                           | 3 (4.2)                                           | 4 (4.6)                                        |
| >10% decrease in LVEF over baseline, n (%)                            | 24 (33.8)                                         | 25 (28.7)                                      |
| <50% absolute value and/or >10% decrease in LVEF over baseline, n (%) | 24 (33.8)                                         | 25 (28.7)                                      |
| <b>Any time on or after Cycle 9, n</b>                                | 179                                               | 171                                            |
| <50%, n (%)                                                           | 20 (11.2)                                         | 20 (11.7)                                      |
| >10% decrease in LVEF over baseline, n (%)                            | 79 (44.1)                                         | 77 (45.0)                                      |
| <50% absolute value and/or >10% decrease in LVEF over baseline, n (%) | 81 (45.3)                                         | 78 (45.6)                                      |
| <b>Lowest post-baseline, n</b>                                        | 200                                               | 201                                            |
| <50%, n (%)                                                           | 23 (11.5)                                         | 25 (12.4)                                      |
| >10% decrease in LVEF over baseline, n (%)                            | 94 (47.0)                                         | 97 (48.3)                                      |
| <50% absolute value and/or >10% decrease in LVEF over baseline, n (%) | 96 (48.0)                                         | 98 (48.8)                                      |

Abbreviation: LVEF, left ventricular ejection fraction.

**Flow diagram: leiomyosarcoma population**

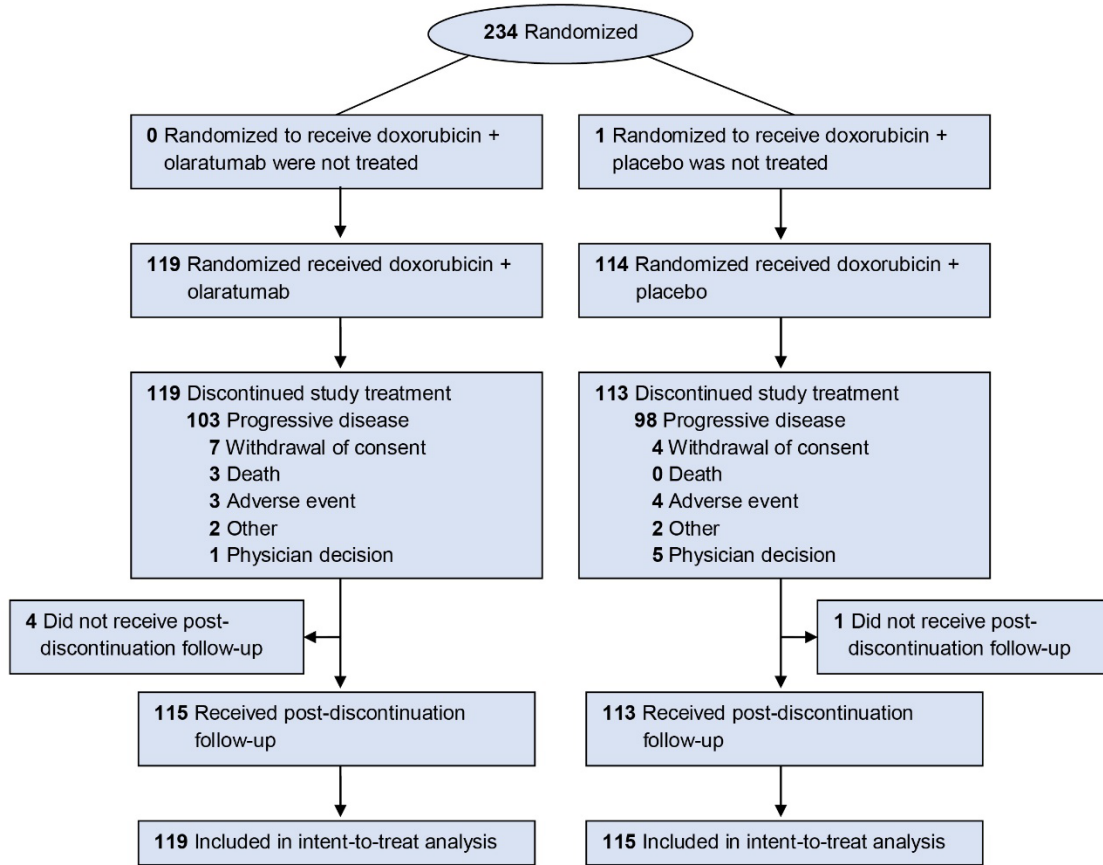

**eFigure 1. Flow of Patient Disposition in the Leiomyosarcoma Population**

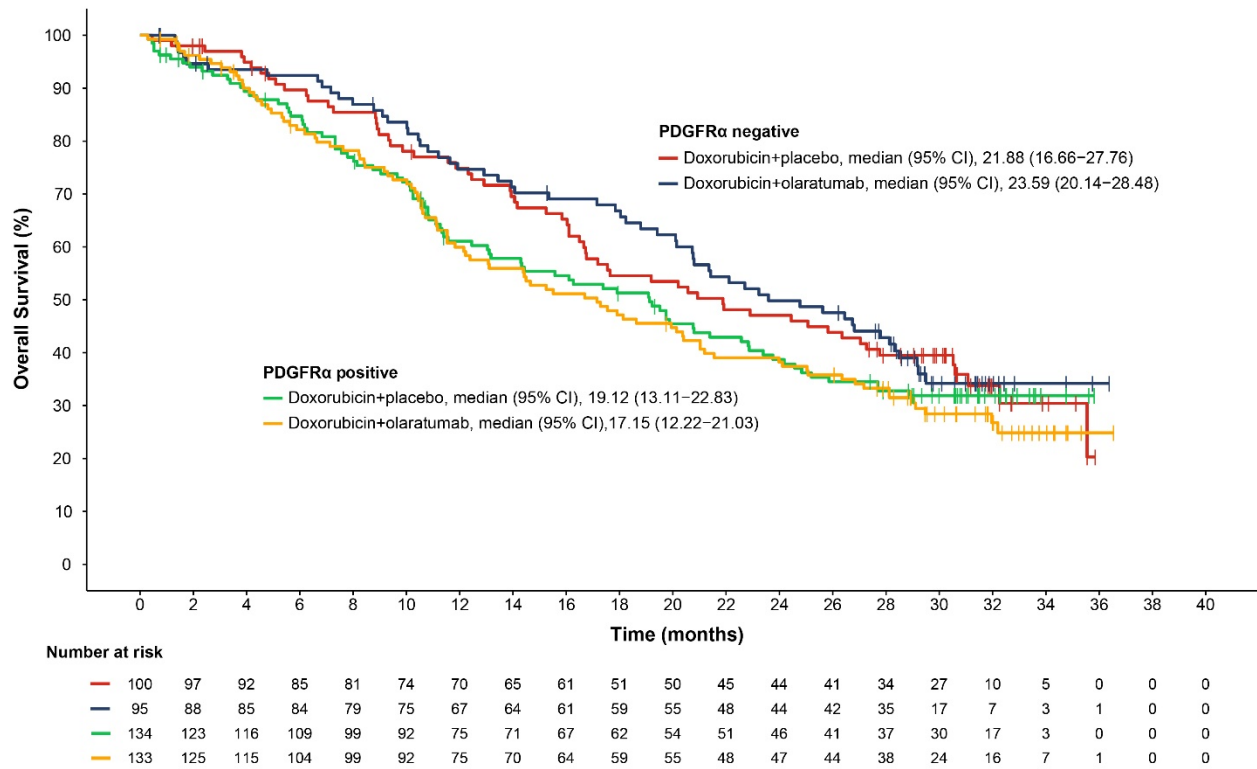

**eFigure 2. Overall Survival by PDGFR $\alpha$  IHC Status (Positive or Negative) in the Total Soft Tissue Sarcoma Population.** Tick marks on curves denote censored observations. Abbreviations: IHC, immunohistochemistry; PDGFR, platelet-derived growth factor receptor.
