# Supplementary material
Source: PubMed Central journal article supplement (PMC7139275)
Supplement: jama-323-1266-s003.pdf [file jama-323-1266-s003.pdf]

## Data Sharing Statement

Tap. Effect of Doxorubicin Plus Olaratumab vs Doxorubicin Plus Placebo on Survival in Patients With Advanced Soft Tissue Sarcomas. *JAMA*. Published April 07, 2020. 10.1001/jama.2020.1707

### Data

**Data available:** Yes

**Data types:** Deidentified participant data

**How to access data:** For details on submitting a request, see the instructions provided at [www.vivli.org](http://www.vivli.org).

**When available:** With publication

### Supporting Documents

**Document types:** None

### Additional Information

**Who can access the data:** Data will be made available to anyone requesting the data.

**Types of analyses:** Lilly provides access to all individual participant data collected during the trial, after anonymization, with the exception of pharmacokinetic or genetic data.

**Mechanisms of data availability:** Access is provided after a proposal has been approved by an independent review committee identified for this purpose and after receipt of a signed data sharing agreement.

**Any additional restrictions:** Data and documents, including the study protocol, statistical analysis plan, clinical study report, blank or annotated case report forms, will be provided in a secure data sharing environment.
